# Supplementary material for: Atypical Legionella GTPase effector hijacks host vesicular transport factor p115 to regulate host lipid droplet
Source: PubMed Central journal article supplement (PMC9757750; doi:10.1126/sciadv.add7945), 2022-12-16
Supplement: sciadv.add7945_sm.pdf [file sciadv.add7945_sm.pdf]

Supplementary Materials for  
**Atypical *Legionella* GTPase effector hijacks host vesicular transport factor  
p115 to regulate host lipid droplet**

Tao-Tao Chen *et al.*

Corresponding author: Aidong Han, [ahan@xmu.edu.cn](mailto:ahan@xmu.edu.cn); Zhao-Qing Luo, [luoz@purdue.edu](mailto:luoz@purdue.edu)

*Sci. Adv.* **8**, eadd7945 (2022)  
DOI: 10.1126/sciadv.add7945

**This PDF file includes:**

Figs. S1 to S11  
Tables S1 to S5  
Legends for raw data S1 to S19

**Other Supplementary Materials for this manuscript includes the following:**

Raw data S1 to S19

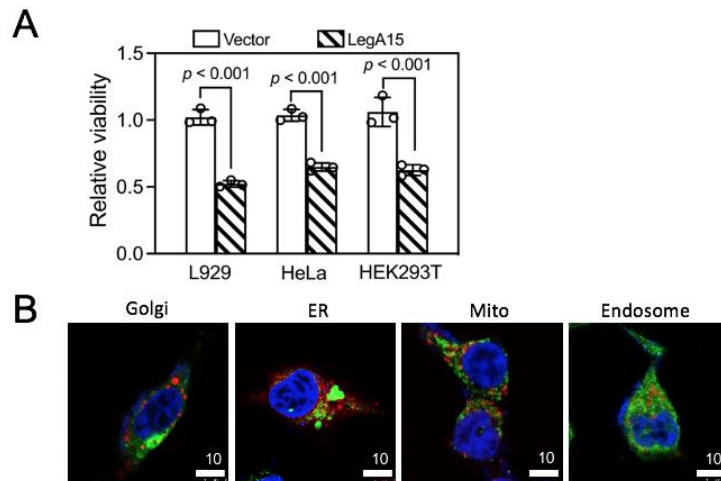

**Fig. S1. Cytotoxicity and localization of over-expressed LegA15.** (A) Viability of mammalian cells expressing FLAG-LegA15 for 24 h. These cells transfected with the empty LegA15 expression vector were used as negative controls. The results shown were from three independent experiments with five replicates, and analyzed by one-way ANOVA assay. (B) Ectopically expressed LegA15-mCherry does not co-localize with Golgi, endoplasmic reticulum (ER), mitochondria (Mito) or endosome. The organelle in green were labeled by specific antibodies for biomarkers TGN46, ERp57, AIF, and Rab7, respectively; Nuclei were stained by DAPI in blue. Scale bars:  $\mu\text{m}$ .

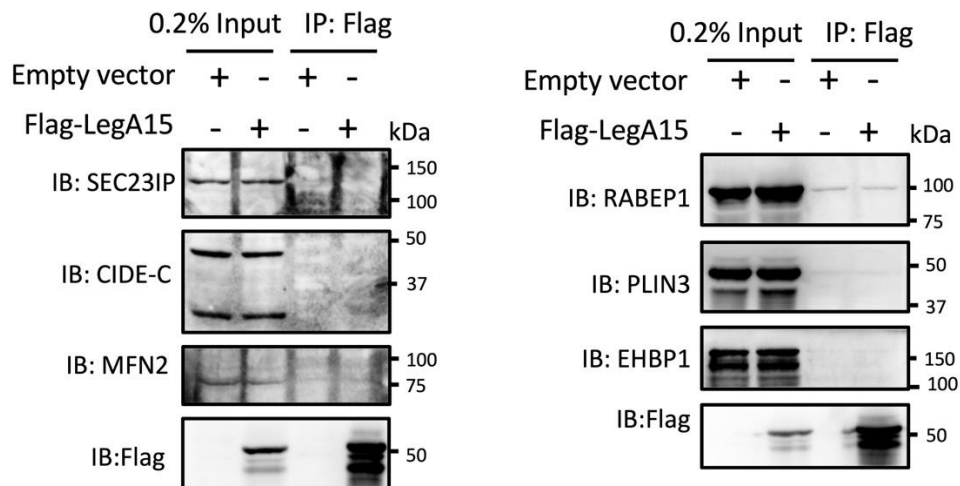

**Fig. S2. Other proteins failed to show their interaction with LegA15.** HEK293T cells expressing Flag-LegA15 were immunoprecipitated by anti-Flag antibody, and potential interaction proteins were detected by their specific antibodies. Cells transfected with an empty vector were used as a negative control.

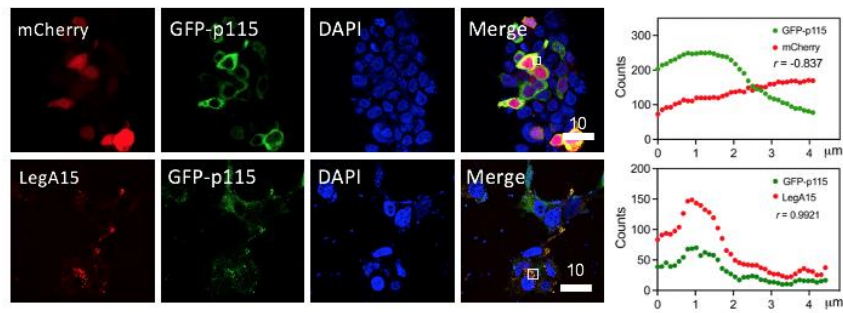

**Fig. S3.** LegA15 co-localizes with over-expressed p115 in HEK293T cells. The cells expressing both LegA15-mCherry and GFP-p115 were fixed and imaged by a confocal microscope. Shown on the right were co-localization analyses with Pearson correlation ( $r$ ) on ROI in white boxes. X-axis is width of ROI and Y-axis is pixel counts for the fluorescence intensity of LegA15 (red curve) and p115 (green curve). Nuclei were stained by DAPI in blue. Scale bars:  $\mu\text{m}$ .

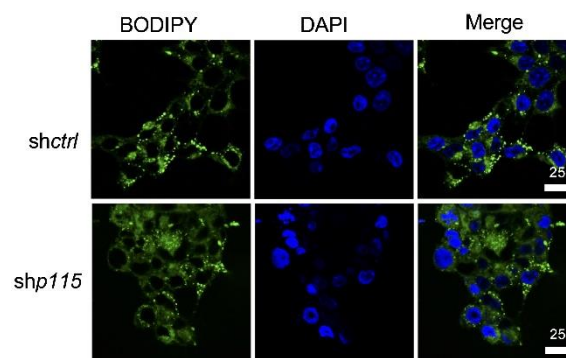

**Fig. S4.** The *p115* knockdown did not appear to affect cellular LDs in HEK293T cells. LDs were stained with BODIPY in green. Nuclei were stained by DAPI in blue. Images were acquired using a confocal microscope. Scale bars:  $\mu\text{m}$ .

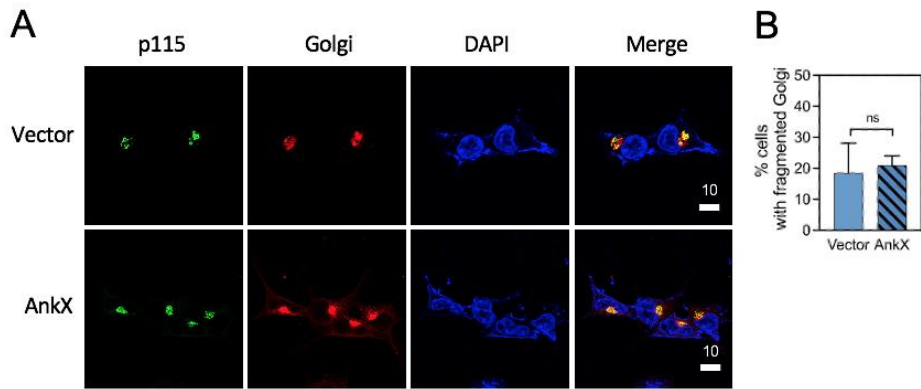

**Fig. S5. AnkX does not induce Golgi fragmentation.** HEK293T cells were over-expressed with Flag-AnkX for 24 h. p115 shown in green was blotted by anti-p115 antibody, and Golgi shown in red was blotted by anti-STX6 antibody. Cells transfected with an empty vector were used as a negative control. Quantification of cells with fragmented Golgi (**B**) was averaged from three groups of cells with more than 100 randomly selected cells in each group.

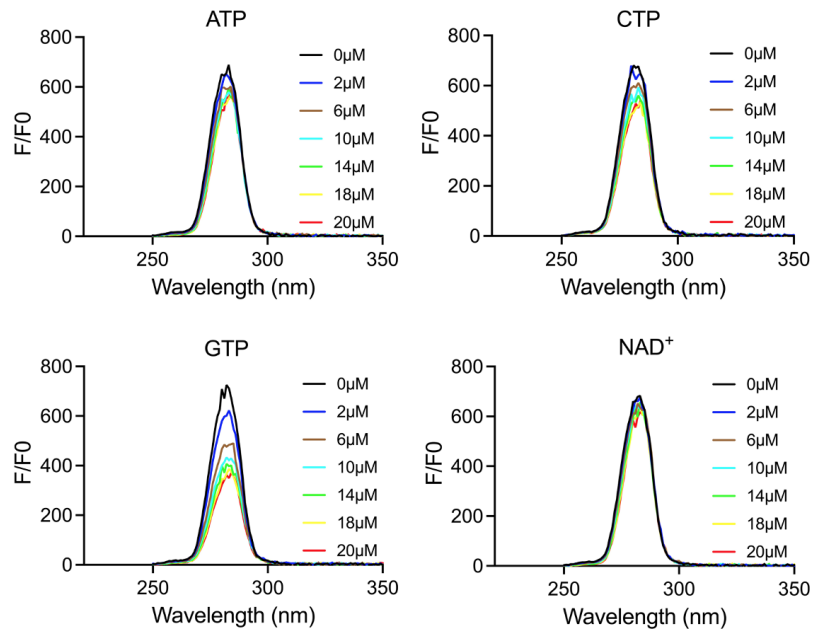

**Fig. S6. Fluorescence titrations for nucleotides binding to LegA15.** Details of titrations were described in method section.

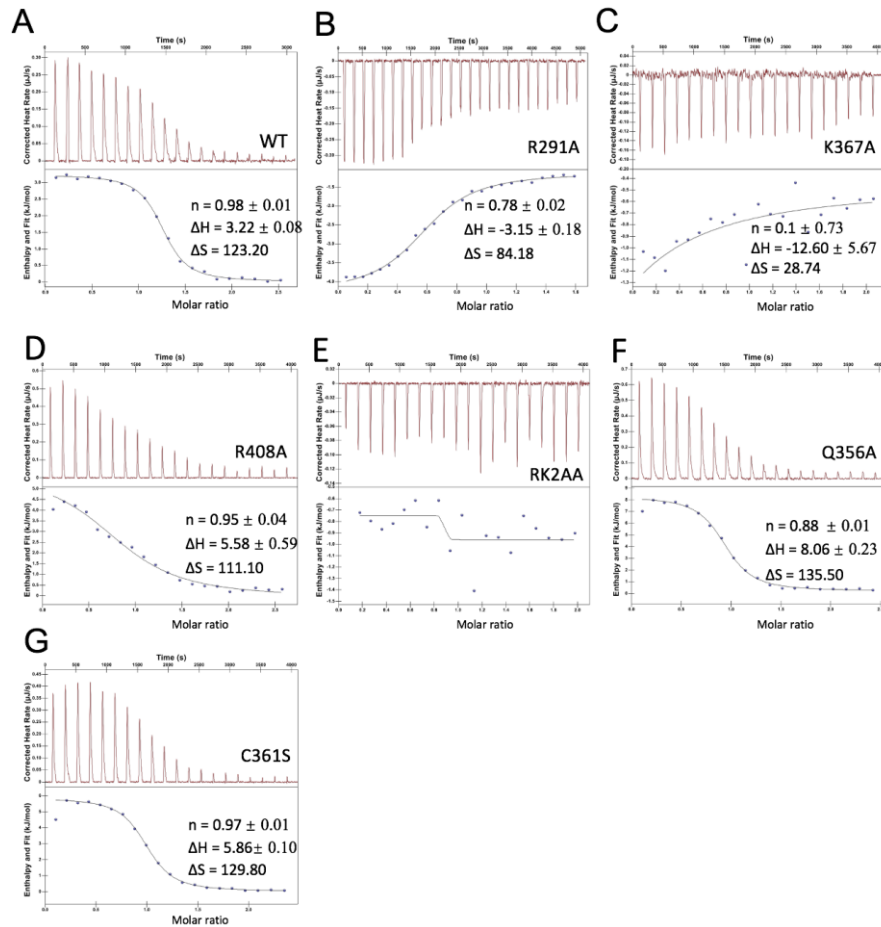

**Fig. S7. Mutational analyses of the GTP-binding pocket of LegA15.** (A-G) Original ITC data for quantification of GTP binding with LegA15 and its mutants in the GTP binding pocket. The derived parameters are shown within.

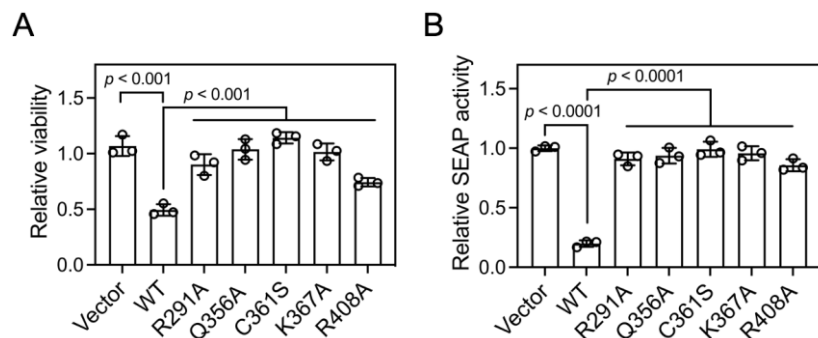

**Fig. S8.** The GTP-binding pocket of LegA15 is important for its cytotoxicity. (A) Viability of HEK293T cells when Flag-LegA15 or its mutants were expressed for 36 h. (B) SEAP activity of HEK293T cells when Flag-LegA15 or its mutants were expressed

for 24 h. Cells transfected with its empty vector were used as a negative control. Results shown were from three independent experiments with five replicates, and analyzed by one-way ANOVA assay.

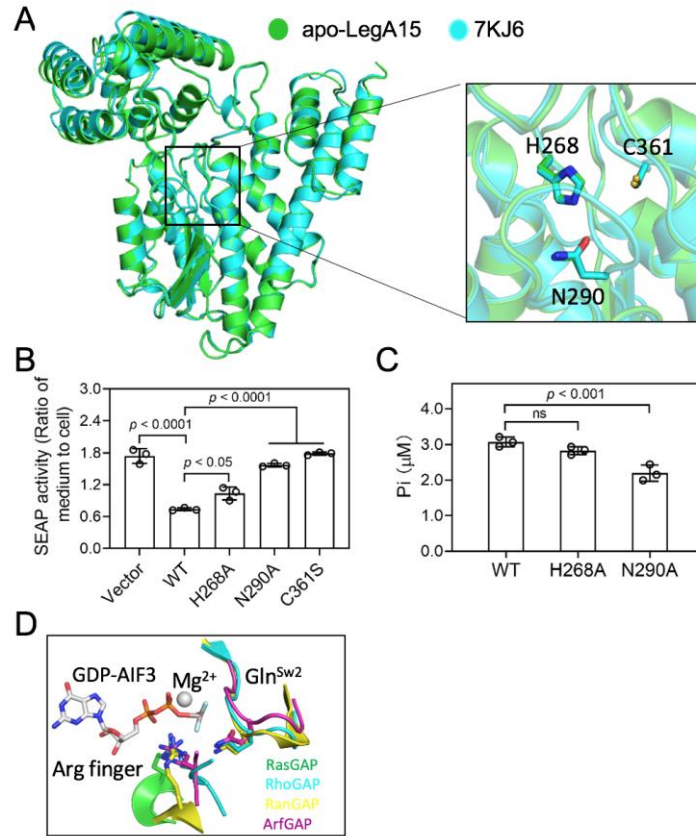

**Fig.S9. Residues His268 and Asn290 are not critical sites to LegA15.** (A) Structural alignment of LegA15. Structures of LegA15 are colored in green (this work) and cyan (PDB ID: 7KJ6) with a proposed catalytic triad C361-H268-N290 shown in a close-up view. (B, C) Mutations of the triad residues affected LegA15 in SEAP activity when over-expressed (B) and its GTP hydrolysis (C). HEK293T cells transfected with its vector were used as a negative control. The SEAP activity was shown by ratio of culture supernatant to the whole cell. Data presented a mean from three independent experiments in triplicate and analyzed by one-way ANOVA assay. (D) Comparison of Lys367 of LegA15 with conventional arginine finger for GTP hydrolysis. The arginine fingers in representative GTPase structures of RasGAP (PDB code: 1WQ1), ArfGAP

(PDB code: 3BH7), RhoGAP (1OW3), and RanGAP (1K5D) are super-imposed. The conserved glutamine and arginine residues are shown as stick models.

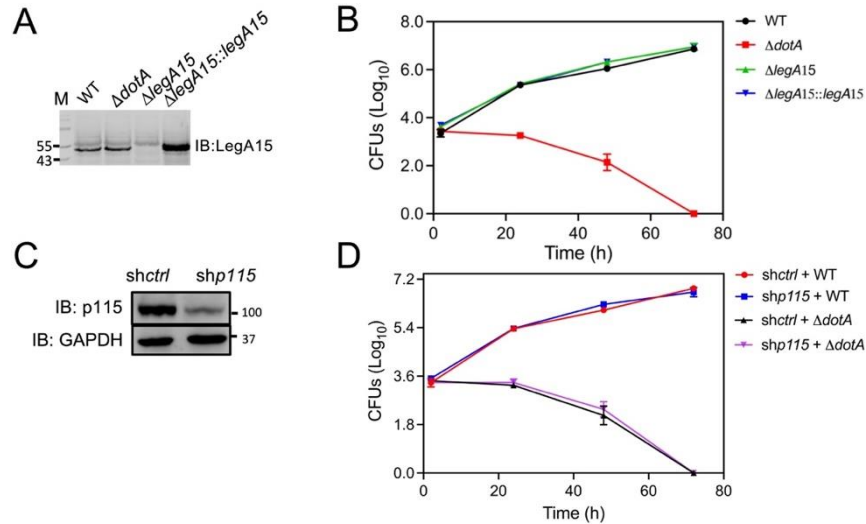

**Fig. S10.** Neither lack of LegA15 nor knockdown of *p115* affects intracellular growth of *L. pneumophila*. (**A, B**) *L. pneumophila* strains with LegA15 deletion  $\Delta legA15$  and its complementation  $\Delta legA15::legA15$  in wild-typed U937 cells. The LegA15 level in the saponin-solubilized fractions of the U937 cells infected by these bacteria was detected with anti-LegA15 antibody (**A**). The growth curves of these bacteria in the U937 cells represent an average of three independent experiments (**B**). (**C, D**) *L. pneumophila* grew in *p115* knockdown U937 cells. The U937 cells were infected with lentivirus expressing shRNA against *p115* (*shp115*) or scrambled shRNA (*shctrl*). The level of p115 was detected by anti-p115 antibody (**C**). The growth curves of these bacteria in the *p115* knockdown U937 cells represent an average of three independent experiments (**D**). *L. pneumophila*  $\Delta dotA$  was used for a negative control.

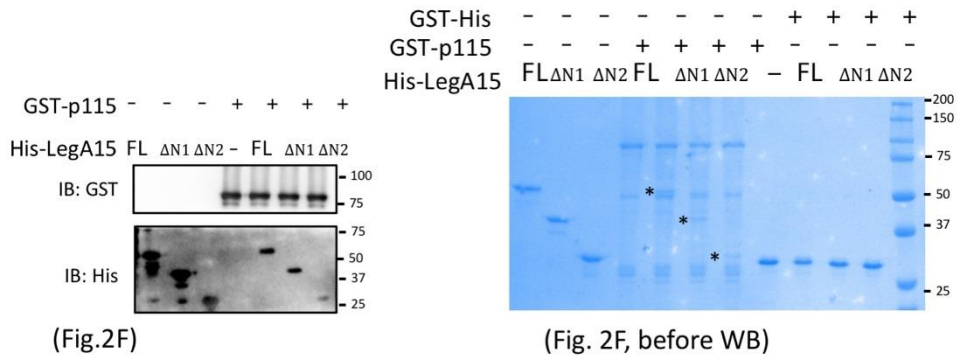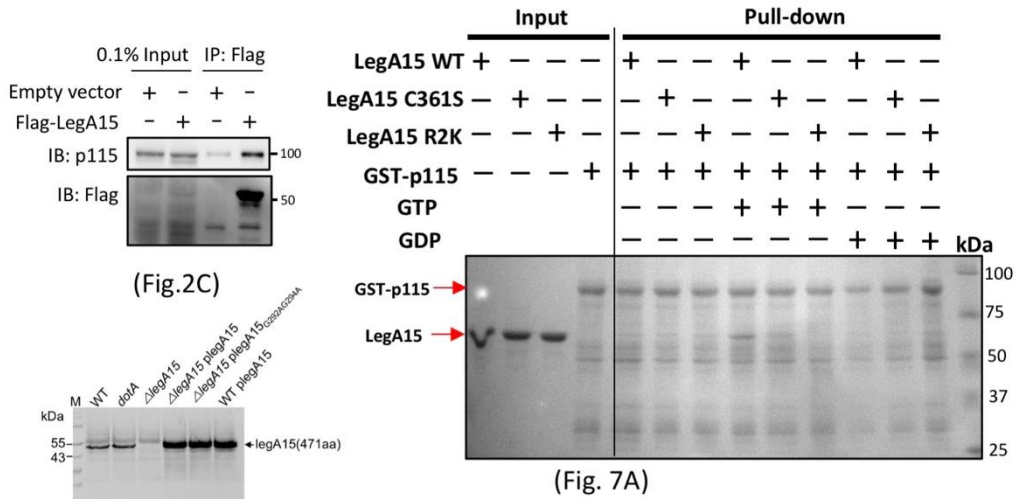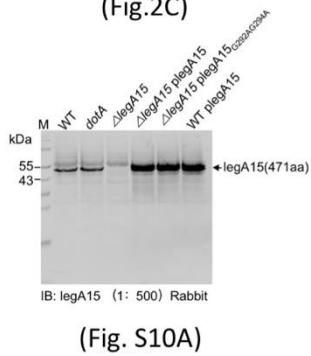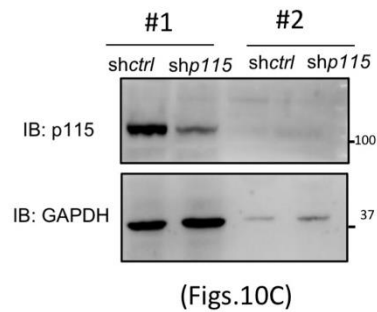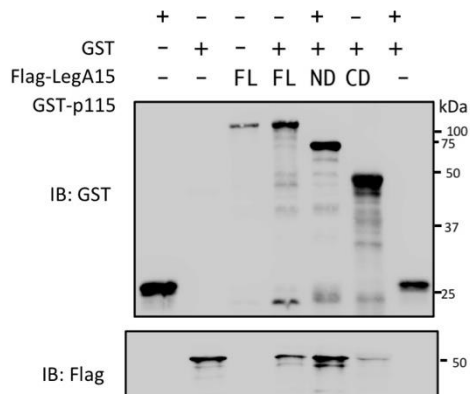

**Fig. S11. Original key data.** All data with associated figures are arranged according to their appearance in the paper.



**Table S1. Proteins in the vesicular trafficking and membrane fusion co-immunoprecipitated with LegA15 and identified by mass spectrometry.**

| No. | Name   | Accession | -10lgP | Coverage (%) | Unique | Description                                                 |
|-----|--------|-----------|--------|--------------|--------|-------------------------------------------------------------|
| 1   | USO1   | O60763    | 403.71 | 46           | 62     | General vesicular transport factor p115                     |
| 2   | IQGA1  | P46940    | 383.45 | 45           | 60     | Ras GTPase-activating-like protein IQGAP1                   |
| 3   | COPG1  | Q9Y678    | 377.33 | 44           | 39     | Coatomer subunit gamma                                      |
| 4   | COPB   | P53618    | 376.89 | 45           | 50     | Coatomer subunit beta                                       |
| 5   | COPA   | P53621    | 376.56 | 43           | 54     | Coatomer subunit alpha                                      |
| 6   | ESYT1  | Q9BSJ8    | 296.72 | 27           | 24     | Extended synaptotagmin                                      |
| 7   | S23IP  | Q9Y6Y8    | 294.03 | 21           | 27     | SEC23-interacting protein                                   |
| 8   | F5H7S7 | F5H7S7    | 282.75 | 26           | 30     | Ras GTPase-activating-like protein IQGAP2                   |
| 9   | VPS35  | Q96QK1    | 277.42 | 28           | 17     | Vacuolar protein sorting-associated protein 35              |
| 10  | GDIB   | P50395    | 275.16 | 44           | 12     | Rab GDP dissociation inhibitor beta                         |
| 11  | COPG2  | Q9UBF2    | 264.2  | 23           | 12     | Coatomer subunit gamma                                      |
| 12  | ACSL3  | O95573    | 262.28 | 28           | 14     | Long-chain-fatty-acid--CoA ligase                           |
| 13  | RBGPR  | Q9H2M9    | 260.83 | 11           | 16     | Rab3 GTPase-activating protein non-catalytic subunit        |
| 14  | AP2B1  | P63010    | 257.11 | 28           | 11     | AP-2 complex subunit beta                                   |
| 15  | RAE2   | P26374    | 255.52 | 26           | 17     | Rab proteins geranylgeranyltransferase component A2         |
| 16  | EXOC4  | Q96A65    | 250.8  | 24           | 18     | Exocyst complex component                                   |
| 17  | RAGP1  | P46060    | 247.34 | 32           | 18     | Ran GTPase-activating protein                               |
| 18  | SC24C  | P53992    | 242.55 | 19           | 17     | Protein transport protein Sec24C                            |
| 19  | RHG17  | Q68EM7    | 242.36 | 14           | 10     | Rho GTPase-activating protein 17                            |
| 20  | SC24A  | O95486    | 238.09 | 18           | 13     | Protein transport protein Sec24A                            |
| 21  | LLGL1  | Q15334    | 236.71 | 17           | 13     | Lethal(2) giant larvae protein homolog                      |
| 22  | TBCD4  | O60343    | 235.98 | 12           | 12     | TBC1 domain family member                                   |
| 23  | AP3B1  | O00203    | 231.97 | 14           | 11     | AP-3 complex subunit beta                                   |
| 24  | WDR11  | Q9BZH6    | 222.17 | 16           | 14     | WD repeat-containing protein                                |
| 25  | TBC9B  | Q66K14    | 218.56 | 9            | 11     | TBC1 domain family member 9B                                |
| 26  | LRBA   | P50851    | 218.18 | 7            | 16     | Lipopolysaccharide-responsive and beige-like anchor protein |
| 27  | VP13A  | Q96RL7    | 216.25 | 6            | 13     | Vacuolar protein sorting-associated protein 13A             |
| 28  | VP13C  | Q709C8    | 212.36 | 8            | 17     | Vacuolar protein sorting-associated protein 13C             |
| 29  | RBGP1  | Q9Y3P9    | 209.43 | 13           | 10     | Rab GTPase-activating protein                               |
| 30  | WDR44  | Q5JSH3    | 204.7  | 17           | 11     | WD repeat-containing protein 44                             |
| 31  | RBP1   | Q15311    | 203.73 | 17           | 11     | RalA-binding protein                                        |
| 32  | RABE1  | Q15276    | 202.05 | 18           | 13     | Rab GTPase-binding effector protein                         |
| 33  | EXOC2  | Q96KP1    | 197.91 | 16           | 10     | Exocyst complex component                                   |
| 34  | FAF2   | Q96CS3    | 197.63 | 21           | 9      | FAS-associated factor                                       |
| 35  | VP26A  | O75436    | 197.51 | 32           | 7      | Vacuolar protein sorting-associated protein 26A             |
| 36  | EXOC1  | Q9NV70    | 191.97 | 17           | 9      | Exocyst complex component                                   |
| 37  | SRGP2  | O75044    | 171.28 | 12           | 9      | SLIT-ROBO Rho GTPase-activating protein                     |
| 38  | RANG   | P43487    | 167.73 | 27           | 8      | Ran-specific GTPase-activating protein                      |
| 39  | RASA1  | P20936    | 166.58 | 12           | 8      | Ras GTPase-activating protein                               |
| 40  | AP1M1  | Q9BXS5    | 160.8  | 24           | 8      | AP-1 complex subunit mu-1                                   |
| 41  | ATG9A  | Q7Z3C6    | 158.78 | 8            | 5      | Autophagy-related protein 9A                                |
| 42  | RBG1L  | Q5R372    | 158.61 | 26           | 3      | Rab GTPase-activating protein 1-like                        |
| 43  | AP1G1  | O43747    | 157.81 | 11           | 7      | AP-1 complex subunit gamma                                  |
| 44  | SNX17  | Q15036    | 151.18 | 19           | 6      | Sorting nexin-17                                            |
| 45  | TXLNA  | P40222    | 151.04 | 14           | 5      | Alpha-taxilin                                               |
| 46  | SCRIB  | Q14160    | 150.12 | 10           | 11     | Protein scribble homolog                                    |

|    |       |        |        |    |   |                                                                         |
|----|-------|--------|--------|----|---|-------------------------------------------------------------------------|
| 47 | COPZ1 | P61923 | 148.26 | 36 | 4 | Coatomer subunit zeta                                                   |
| 48 | TPPC8 | Q9Y2L5 | 147.63 | 9  | 8 | Trafficking protein particle complex subunit                            |
| 49 | MFN2  | O95140 | 147.11 | 11 | 6 | Mitofusin                                                               |
| 50 | ACAP2 | Q15057 | 143.23 | 7  | 5 | Arf-GAP with coiled-coil ANK repeat and PH domain-containing protein 2  |
| 51 | ARAP1 | Q96P48 | 141.45 | 10 | 9 | Arf-GAP with Rho-GAP domain ANK repeat and PH domain-containing protein |
| 52 | TPC11 | Q7Z392 | 139.23 | 6  | 6 | Trafficking protein particle complex subunit                            |
| 53 | NSF   | P46459 | 139.13 | 11 | 8 | Vesicle-fusing ATPase                                                   |
| 54 | RBG1L | Q5R372 | 138.63 | 8  | 3 | Rab GTPase-activating protein 1-like                                    |
| 55 | NGAP  | Q9UJF2 | 137.54 | 6  | 6 | Ras GTPase-activating protein nGAP                                      |
| 56 | AP2S1 | P53680 | 135.27 | 33 | 4 | AP-2 complex subunit sigma                                              |
| 57 | EHBP1 | Q8NDI1 | 130.13 | 5  | 4 | EH domain-binding protein                                               |
| 58 | SNX2  | O60749 | 127.84 | 11 | 4 | Sorting nexin-2                                                         |
| 59 | MFN1  | Q8IWA4 | 126.56 | 9  | 5 | Mitofusin                                                               |
| 60 | SCFD1 | Q8WVM8 | 125.92 | 14 | 6 | Sec1 family domain-containing protein                                   |
| 61 | VPS51 | Q9UID3 | 125.13 | 8  | 4 | Vacuolar protein sorting-associated protein 51 homolog                  |
| 62 | RB3GP | Q15042 | 123.97 | 8  | 6 | Rab3 GTPase-activating protein catalytic subunit                        |
| 63 | GAPD1 | Q14C86 | 121.82 | 7  | 8 | GTPase-activating protein and VPS9 domain-containing protein            |
| 64 | RLGPB | Q86X10 | 121.03 | 4  | 4 | Ral GTPase-activating protein subunit beta                              |
| 65 | RHG35 | Q9NRY4 | 119.69 | 5  | 5 | Rho GTPase-activating protein 35                                        |
| 66 | VP26B | Q4G0F5 | 119.04 | 19 | 5 | Vacuolar protein sorting-associated protein 26B                         |
| 67 | RHG05 | Q13017 | 117.3  | 4  | 5 | Rho GTPase-activating protein 5                                         |
| 68 | M2OM  | Q02978 | 114.9  | 20 | 3 | Mitochondrial 2-oxoglutarate/malate carrier protein                     |
| 69 | TBCD1 | Q86TI0 | 114.21 | 15 | 1 | TBC1 domain family member 15                                            |
| 70 | FCHO2 | QUJRZ9 | 110.6  | 14 | 3 | F-BAR domain only protein                                               |
| 71 | ZFY16 | Q7Z3T8 | 109.71 | 4  | 4 | Zinc finger FYVE domain-containing protein 16                           |
| 72 | SNX5  | Q9Y5X3 | 109.1  | 11 | 4 | Sorting nexin-5                                                         |
| 73 | SNAA  | P54920 | 105.97 | 23 | 4 | Alpha-soluble NSF attachment protein                                    |
| 74 | MILK1 | Q8N3F8 | 105.62 | 6  | 4 | MICAL-like protein                                                      |
| 75 | TBC15 | Q8TC07 | 104.85 | 6  | 2 | TBC1 domain family member 15                                            |
| 76 | C2CD5 | Q86YS7 | 104.27 | 4  | 3 | C2 domain-containing protein 5                                          |
| 77 | VPS36 | Q86VN1 | 104.17 | 15 | 4 | Vacuolar protein-sorting-associated protein 36                          |
| 78 | VTA1  | Q9NP79 | 103.47 | 14 | 3 | Vacuolar protein sorting-associated protein VTA1 homolog                |
| 79 | G3BP1 | Q13283 | 101.81 | 9  | 3 | Ras GTPase-activating protein-binding protein                           |
| 80 | ANR50 | Q9ULJ7 | 99.48  | 3  | 3 | Ankyrin repeat domain-containing protein 50                             |
| 81 | VAT1  | Q99536 | 96.56  | 16 | 5 | Synaptic vesicle membrane protein VAT-1 homolog                         |
| 82 | IQGA3 | Q86VI3 | 94.98  | 4  | 3 | Ras GTPase-activating-like protein IQGAP3                               |
| 83 | ARF5  | P84085 | 94.62  | 28 | 1 | ADP-ribosylation factor 5                                               |
| 84 | AUP1  | Q9Y679 | 92.95  | 10 | 3 | Ancient ubiquitous protein                                              |
| 85 | SYNJ1 | O43426 | 91.49  | 3  | 3 | Synaptojanin                                                            |
| 86 | SCAM  | O15126 | 90.98  | 12 | 2 | Secretory carrier-associated membrane protein                           |
| 87 | PTN23 | Q9H3S7 | 90.88  | 3  | 4 | Tyrosine-protein phosphatase non-receptor type 23                       |
| 88 | PLIN3 | O60664 | 87.43  | 6  | 3 | Perilipin-3                                                             |
| 89 | VAPB  | O95292 | 82.46  | 11 | 2 | Vesicle-associated membrane protein-associated protein B/C              |
| 90 | ASAP1 | Q9ULH1 | 69.48  | 3  | 2 | Arf-GAP with SH3 domain ANK repeat and PH domain-containing protein     |
| 91 | RGPA1 | Q6GYQ0 | 68.69  | 2  | 2 | Ral GTPase-activating protein subunit alpha                             |
| 92 | PLIN1 | O60240 | 30.05  | 1  | 1 | Perilipin-1                                                             |
| 93 | SNX27 | Q96L92 | 29.79  | 3  | 1 | Sorting nexin-27                                                        |

**Table S2. Data collection and refinement statistics.**

|                                                         | <b>LegA15</b><br>(PDB ID: 7EW8) | <b>LegA15/GDPNP</b><br>(PDB ID: 7XQL)                 |
|---------------------------------------------------------|---------------------------------|-------------------------------------------------------|
| <b>Data Collection</b>                                  |                                 |                                                       |
| Space group                                             | <i>P</i> 2 <sub>1</sub>         | <i>P</i> 2 <sub>1</sub> 2 <sub>1</sub> 2 <sub>1</sub> |
| <b>Cell dimensions</b>                                  |                                 |                                                       |
| a,b,c (Å)                                               | 66.058, 75.997, 104.814         | 75.606, 77.833, 170.656                               |
| α,β,γ (°)                                               | 90.000, 90.807, 90.000          | 90.000, 90.000, 90.000                                |
| Wavelength (Å)                                          | 0.9789                          | 0.9792                                                |
| Resolution (Å)                                          | 40 -2.59 (2.63 - 2.59)          | 34.6 - 2.27 (2.353 - 2.27)                            |
| No. reflections                                         | 206532 (32235)                  | 627872 (35047)                                        |
| <i>R</i> <sub>merge</sub>                               | 0.091 (0.565)                   | 0.119 (0.545)                                         |
| <i>I</i> / $\sigma$                                     | 21.77 (2.55)                    | 18.55 (6.3)                                           |
| CC <sub>1/2</sub>                                       | 0.995 (0.851)                   | 0.998 (0.854)                                         |
| <i>R</i> <sub>pim</sub>                                 | 0.03 (0.274)                    | 0.035 (0.096)                                         |
| <i>R</i> <sub>meas</sub>                                | 0.093 (0.628)                   | 0.128 (0.595)                                         |
| Completeness (%)                                        | 99.6 (94.9)                     | 99.10 (95.08)                                         |
| Redundancy                                              | 6.4 (4.5)                       | 12.8 (11.5)                                           |
| <b>Refinement</b>                                       |                                 |                                                       |
| Resolution (Å)                                          | 29.20-2.59 (2.68 - 2.59)        | 34.6 - 2.27 (2.353 - 2.27)                            |
| No. reflections                                         | 31295 (3011)                    | 46801 (4426)                                          |
| <i>R</i> <sub>work</sub> / <i>R</i> <sub>free</sub> (%) | 20.86/23.83<br>(34.41/38.67)    | 18.22/22.78<br>(21.81/25.99)                          |
| <b>No. atoms</b>                                        |                                 |                                                       |
| Protein                                                 | 6741                            | 6872                                                  |
| Ligand                                                  | 0                               | 32                                                    |
| Solvent                                                 | 176                             | 217                                                   |
| B factors (Å <sup>2</sup> )                             | 47.37                           | 42.60                                                 |
| Protein                                                 | 47.77                           | 42.49                                                 |
| Solvent                                                 | 32.29                           | 41.81                                                 |
| <b>R.m.s deviations</b>                                 |                                 |                                                       |
| Bond Lengths (Å)                                        | 0.006                           | 0.008                                                 |
| Bond angles (°)                                         | 0.89                            | 0.91                                                  |
| <b>Ramachandran plot (%)</b>                            |                                 |                                                       |
| Favored                                                 | 95.82                           | 97.73                                                 |
| Allowed                                                 | 4.18                            | 2.27                                                  |
| Outliers                                                | 0.00                            | 0.00                                                  |

Note: Statistics for the highest resolution shell are shown in parentheses.

**Table S3. Top structures similar to LegA15 analyzed by PDBeFold server.**

|    | Z-Score | RMSD (Å) | Seq (id%) | Match (PDB_ID) | Description                                                                                                   |
|----|---------|----------|-----------|----------------|---------------------------------------------------------------------------------------------------------------|
| 1  | 2.5     | 4.65     | 8         | 5mpa:A         | 26S proteasome in presence of ATP (S2)                                                                        |
| 2  | 2.3     | 4.45     | 10        | 1esq:A         | Thiazole kinase mutant (C198S) with ATP and thiazole phosphate                                                |
| 3  | 2.3     | 4.67     | 8         | 4g1c:B         | Human SIRT5 bound to succ-IDH2 and carba-NAD                                                                  |
| 4  | 2.1     | 4.27     | 6         | 4utn:A         | Zebra fish Sirtuin 5 in complex with succinylated CPS1-peptide                                                |
| 5  | 1.3     | 5.09     | 10        | 1i7e:A         | R. Rubrum transhydrogenase domain I with bound NADH                                                           |
| 6  | 1.3     | 5.01     | 8         | 6cwa:B         | PHGDH in complex with NADH and 3-phosphoglycerate                                                             |
| 7  | 1.2     | 5.45     | 5         | 1gzg:B         | Mg <sup>2+</sup> -dependent porphobilinogen synthase from Pseudomonas Aeruginosa with 5-fluoroolevulinic acid |
| 8  | 1.1     | 4.84     | 4         | 1mlv:A         | A SET domain protein methyltransferase                                                                        |
| 9  | 1.0     | 5.17     | 4         | 4mag:A         | The periplasmic sialic acid binding protein from Vibrio Cholerea                                              |
| 10 | 1.0     | 4.73     | 7         | 3zgo:C         | Human SIRT2 apo form                                                                                          |

**Table S4. Primers used in this study**

| <b>Primers</b>                                            | <b>Sequences</b>                                     | <b>Usage</b>                             |
|-----------------------------------------------------------|------------------------------------------------------|------------------------------------------|
| <i>legA15</i> KO-up-F (PL1)                               | ctggagctcagtcattatctcgaagcctag                       | To construct $\Delta$ <i>legA15</i>      |
| <i>legA15</i> KO-up-R (PL2)                               | tgctttcagatttatcggtggttgaatttttg                     | To construct $\Delta$ <i>legA15</i>      |
| <i>legA15</i> KO-down-F (PL3)                             | caccgataaatctgaaagcagtatgacact                       | To construct $\Delta$ <i>legA15</i>      |
| <i>legA15</i> KO-down-RI (PL4)                            | acgctgcgacatgtagatggcttattacaatag                    | To construct $\Delta$ <i>legA15</i>      |
| <i>legA15</i> -XbaI-F (PL5)                               | agc <b>TCTAGA</b> atgttgactcctccg                    | To clone <i>legA15</i> into pJB908       |
| <i>legA15</i> -SalI-F (PL6)                               | agc <b>GTCGAC</b> ttaaatggttttccctgg                 | To clone <i>legA15</i> into pJB908       |
| <i>legA15</i> -NheI-F (PL7)                               | agc <b>GCTAGC</b> atgttgactcctccg                    | To build pET28- <i>legA15</i>            |
| <i>legA15</i> -XhoI-R (PL8)                               | agc <b>CTCGAG</b> ttaaatggttttccctgg                 | To build pET28- <i>legA15</i>            |
| <i>legA15</i> -EcoRIgt-F (PL9)                            | ccg <b>GAATTC</b> GTatgttgactcctcc                   | To build pCMV- <i>legA15</i>             |
| <i>legA15</i> - <i>mCherry</i> -F                         | gaaaaccattctcgagatgggtgagc                           | For gene fusion                          |
| <i>legA15</i> - <i>mCherry</i> -R                         | ctcgagaatggttttccctggttgg                            | For gene fusion                          |
| <i>legA15</i> <sub>(1-192)</sub> - <i>mCherry</i> -XhoI-R | gccttgcctcaccatctcgagcttactgtcaagagcaa               | To build <i>legA15</i> fragment          |
| <i>legA15</i> <sub>(95-471)</sub> - <i>mCherry</i> -F     | agcgctccattggatgacagcgcacaaagcgcattaattcaagccacaaact | To build <i>legA15</i> fragment          |
| <i>legA15</i> <sub>(95-471)</sub> - <i>mCherry</i> -R     | tgtgcgctgtcctcaatggagcgccttaattatccaaatttatcg        |                                          |
| <i>legA15</i> <sub>(95-471)</sub> -NheI                   | agc <b>GCTAGC</b> cacagcgcacaaagcgcattaattc          | To build <i>legA15</i> fragment          |
| <i>legA15</i> <sub>(195-471)</sub> -NheI                  | agc <b>GCTAGC</b> cccacttatcaattgatgacagattc         | To build <i>legA15</i> fragment          |
| <i>legA15</i> -FLAG-F                                     | catcatcatcatcacgattacaaggacagcagatgacaag             | To insert FLAG into pET28- <i>legA15</i> |
| <i>legA15</i> -FLAG-R                                     | cggcaccaggccgctgctctgtcatcgtcgtccttgaatc             | To insert FLAG into pET28- <i>legA15</i> |
| <i>mCherry</i> -NotI-R                                    | agc <b>GCGGCCG</b> Cttactgtacagctcgtccatgc           | To clone <i>mCherry</i>                  |
| <i>legA15</i> -G292A/G294A-F                              | cgtgcacttgacagaaagagcagc                             | For mutagenesis                          |
| <i>legA15</i> -G292A/G294A-R                              | gctgcaagtgcacgattggtatataacc                         | For mutagenesis                          |
| <i>legA15</i> -K296A/S297A-F                              | gagcagcagcaagcagcatgg                                | For mutagenesis                          |
| <i>legA15</i> -K296A/G297A-R                              | cgcttcctgctgctccaagacc                               | For mutagenesis                          |
| <i>legA15</i> -R291A-F                                    | ccaatgccggtcttggagcaaacagc                           | For mutagenesis                          |
| <i>legA15</i> -R291A-R                                    | ccaagaccggcattggtatataaccaggtagcc                    | For mutagenesis                          |
| <i>legA15</i> -K367A-F                                    | ccaactccgctccaacatagaggaatac                         | For mutagenesis                          |
| <i>legA15</i> -K367A-R                                    | gttgaggcggagttggctattgtgc                            | For mutagenesis                          |
| <i>legA15</i> -R408A-F                                    | caaaacatatggccgtgaaaaagtcaatgaattagcc                | For mutagenesis                          |
| <i>legA15</i> -R408A-R                                    | tttcaacggccatatgtttgtaattcctgtatc                    | For mutagenesis                          |
| <i>legA15</i> -Q356A-F                                    | caaaaaggagcAAAAATgacaattgcacaatagcc                  | For mutagenesis                          |
| <i>legA15</i> -Q356A-R                                    | cattttggctccttttggatggtgaatgg                        | For mutagenesis                          |
| <i>legA15</i> -C361S-F                                    | gacaattccacaatagccaactcc                             | For mutagenesis                          |
| <i>legA15</i> -C361S-R                                    | gctattgtggaattgtcattttttgtcc                         | For mutagenesis                          |
| <i>p115</i> <sub>1-651</sub> -BamHI-F                     | agc <b>GGATCC</b> atgaattcctccgcgggg                 | To build <i>p115</i> fragment            |
| <i>p115</i> <sub>1-651</sub> -EcoRI-R                     | agc <b>GAATTC</b> caacaattatgcatgctgttctaattgtttt    | To build <i>p115</i> fragment            |
| <i>p115</i> <sub>651-961</sub> -BamHI-F                   | agc <b>GGATCC</b> attgtgactactacaaaaaatag            | To build <i>p115</i> fragment            |
| <i>p115</i> <sub>651-961</sub> -EcoRI-R                   | agc <b>GAATTC</b> ctagatgatctagatccttgc              | To build <i>p115</i> fragment            |

Note: The restriction sites are in bold uppercase.

**Table S5. Resources of key materials used for this study**

| REAGENT or RESOURCE                                                     | SOURCE             | IDENTIFIER  |
|-------------------------------------------------------------------------|--------------------|-------------|
| <b>Antibodies</b>                                                       |                    |             |
| Rabbit polyclonal anti-Flag                                             | Proteintech, China | 20543-1-AP  |
| Rabbit polyclonal Anti-HA                                               | Proteintech, China | 51064-2-AP  |
| Rabbit polyclonal Anti-p115                                             | Proteintech, China | 13509-1-AP  |
| Rabbit polyclonal Anti-LegA15                                           | This study         | N/A         |
| Rabbit polyclonal Anti- <i>Legionella</i>                               | Abcam, England     | ab20943     |
| Rabbit polyclonal Anti-PLIN3                                            | Proteintech, China | 10694-1-AP  |
| Rabbit polyclonal Anti-CIDE-C                                           | Proteintech, China | 12287-1-AP  |
| Rabbit polyclonal Anti-GST                                              | Proteintech, China | 10000-0-AP  |
| Rabbit polyclonal Anti-Rab7                                             | Proteintech, China | 15967-1-AP  |
| Mouse polyclonal Anti-p115                                              | Proteintech, China | 68100-1-Ig  |
| Mouse monoclonal Anti-His                                               | Proteintech, China | 66005-1-Ig  |
| Rabbit polyclonal Anti-EHBP1                                            | Proteintech, China | 17637-1-AP  |
| Rabbit polyclonal Anti-RABEP1                                           | Proteintech, China | 14350-1-AP  |
| Rabbit polyclonal Anti-MFN2                                             | Proteintech, China | 12186-1-AP  |
| Rabbit polyclonal Anti-SEC32IP                                          | Proteintech, China | 20892-1-AP  |
| Rabbit polyclonal Anti-ERp57/ERp60                                      | Proteintech, China | 15967-1-AP  |
| Rabbit polyclonal Anti-AIF                                              | Proteintech, China | 17984-1-AP  |
| Rabbit polyclonal Anti-Syntaxin 6                                       | Proteintech, China | 10841-1-AP  |
| HRP-conjugated Goat anti-Mouse                                          | Proteintech, China | SA00001-1   |
| HRP-conjugated Goat anti-Rabbit                                         | Proteintech, China | SA00001-2   |
| Coralite488-Goat anti-Rabbit                                            | Proteintech, China | SA00013-2   |
| Coralite488-Goat anti-Mouse                                             | Proteintech, China | SA00013-1   |
| Coralite594-Goat anti-Rabbit                                            | Proteintech, China | SA00013-4   |
| <b>Bacterial strains</b>                                                |                    |             |
| <i>Legionella pneumophila</i> Philadelphia-1 strain Lp02                | Ref. 57            | N/A         |
| <i>L.pneumophila</i> Lp03 $\Delta$ dotA                                 | Ref. 58            | N/A         |
| <i>L.pneumophila</i> $\Delta$ legA15                                    | This study         | N/A         |
| <i>L.pneumophila</i> $\Delta$ legA15::legA15                            | This study         | N/A         |
| <i>Escherichia coli</i> DH5 $\alpha$                                    | Tangen, China      | N/A         |
| <i>Escherichia coli</i> BL21/DE3                                        | Tangen, China      | N/A         |
| <b>Chemicals and peptides</b>                                           |                    |             |
| Dulbecco's Modified Eagle's Medium with L-glutamine and sodium pyruvate | Gibco, USA         | C11995500BT |
| RIPM1640 medium                                                         | Gibco, USA         | C11875500BT |
| Fetal bovine serum                                                      | Gibco, USA         | 10270-106   |
| 3xFLAG peptide                                                          | Genescript, China  | RP10586     |
| Formaldehyde (37%)                                                      | Sigma, USA         | F8775       |
| GTP                                                                     | Sigma, USA         | 10106399001 |
| GDP                                                                     | Sigma, USA         | G7127       |
| GDPNP                                                                   | GlpBio             | GC13248-10  |
| NAD <sup>+</sup>                                                        | Sigma, USA         | 53-84-9     |
| ATP                                                                     | Sigma, USA         | A1852       |
| CTP                                                                     | Sangon, China      | A620134     |
| BODIPY                                                                  | Invivogen          | D3922       |
| TurboFect <sup>TM</sup> transfection reagent                            | Thermo, USA        | R0531       |
| Anti-DYKDDDDK G1 affinity resin                                         | GenScript, China   | L00432-1    |
| Glutathione agarose resin                                               | Thermo, USA        | 16101       |

|                                                                          |                             |            |
|--------------------------------------------------------------------------|-----------------------------|------------|
| Nickel affinity agarose                                                  | Sangon, China               | C60033     |
| Critical commercial assays                                               |                             |            |
| SEAP Reporter Assay Kit                                                  | Invivogen, China            | Psetz-seap |
| High Throughput Colorimetric ATPase Assay Kit                            | Expedeon, UK                | 303-0030   |
| Cell Counting Kit-8                                                      | Yeasan, China               | K1018      |
| Deposited data                                                           |                             |            |
| LegA15 structure                                                         | Protein Data Bank           | 7ew8       |
| LegA15/GDPNP structure                                                   | Protein Data Bank           | 7xql       |
| Cell lines                                                               |                             |            |
| HEK293T cells                                                            | Li lab (Xiamen University)  | N/A        |
| HEK293T- <i>p115</i> KD cells                                            | This study                  | N/A        |
| U937 cells                                                               | ATCC, USA                   | N/A        |
| U937- <i>p115</i> KD cells                                               | This study                  | N/A        |
| BMDM cells                                                               | ATCC, USA                   | N/A        |
| Raw264.7                                                                 | ATCC, USA                   | N/A        |
| HeLa                                                                     | Li lab (Xiamen University)  | N/A        |
| L929                                                                     | Han lab (Xiamen University) | N/A        |
| Oligonucleotides                                                         |                             |            |
| Primers used in this study are listed in Table S4                        | This study                  | N/A        |
| Constructs                                                               |                             |            |
| pET28- <i>legA15</i>                                                     | This study                  | N/A        |
| pET28-2xFLAG- <i>legA15</i>                                              | This study                  | N/A        |
| pET28- <i>legA15</i> <sup>R291A</sup>                                    | This study                  | N/A        |
| pET28- <i>legA15</i> <sup>Q356A</sup>                                    | This study                  | N/A        |
| pET28- <i>legA15</i> <sup>C361S</sup>                                    | This study                  | N/A        |
| pET28- <i>legA15</i> <sup>K367A</sup>                                    | This study                  | N/A        |
| pET28- <i>legA15</i> <sup>R408A</sup>                                    | This study                  | N/A        |
| pET28- <i>legA15</i> <sup>R291A/K367A/R408A</sup>                        | This study                  | N/A        |
| pET28- <i>legA15</i> <sup>K367R</sup>                                    | This study                  | N/A        |
| pET28- <i>legA15</i> <sup>H268A</sup>                                    | This study                  | N/A        |
| pET28- <i>legA15</i> <sup>N290A</sup>                                    | This study                  | N/A        |
| pET28- <i>legA15</i> 95-471                                              | This study                  | N/A        |
| pET28- <i>legA15</i> 195-471                                             | This study                  | N/A        |
| pCMV-3xFLAG- <i>legA15</i>                                               | This study                  | N/A        |
| pCMV-3xFLAG- <i>legA15</i> <sup>R291A</sup>                              | This study                  | N/A        |
| pCMV-3xFLAG- <i>legA15</i> <sup>Q356A</sup>                              | This study                  | N/A        |
| pCMV-3xFLAG- <i>legA15</i> <sup>C361S</sup>                              | This study                  | N/A        |
| pCMV-3xFLAG- <i>legA15</i> <sup>K371A</sup>                              | This study                  | N/A        |
| pCMV-3xFLAG- <i>legA15</i> <sup>R408A</sup>                              | This study                  | N/A        |
| pCMV-3xFLAG- <i>legA15</i> <sup>R291A/K367A/R408A</sup>                  | This study                  | N/A        |
| pCMV-3xFLAG- <i>legA15</i> - <i>mCherry</i>                              | This study                  | N/A        |
| pCMV-3xFLAG- <i>legA15</i> (1-192) - <i>mCherry</i>                      | This study                  | N/A        |
| pCMV-3xFLAG- <i>legA15</i> (95-471) - <i>mCherry</i>                     | This study                  | N/A        |
| pCMV-3xFLAG- <i>mCherry</i>                                              | This study                  | N/A        |
| pCMV-3xFLAG- <i>legA15</i> <sup>C361S</sup> - <i>mCherry</i>             | This study                  | N/A        |
| pCMV-3xFLAG- <i>legA15</i> <sup>R291A/K367A/R408A</sup> - <i>mCherry</i> | This study                  | N/A        |
| pGEX6p- <i>p115</i>                                                      | This study                  | N/A        |
| pGEX6p- <i>p115</i> 1-651                                                | This study                  | N/A        |
| pGEX6p- <i>p115</i> 651-821                                              | This study                  | N/A        |
| pEGFP- <i>p115</i> (For GFP- <i>p115</i> fusion)                         | This study                  | N/A        |
| pSR47s-Δ <i>legA15</i> (5' 45bp + 3' 45bp)                               | This study                  | N/A        |

|                       |                       |     |
|-----------------------|-----------------------|-----|
| pJB908- <i>legA15</i> | This study            | N/A |
| pJB908-2xFYVE-GFP     | This study            | N/A |
| pLKO.1-sh <i>p115</i> | This study            | N/A |
| Others                |                       |     |
| ImageJ                | NIH                   | N/A |
| Graphpad Prism 7.0    | San Diego, USA        | N/A |
| Pymol                 | DeLano Scientific LLC | N/A |



### **Raw auxiliary data captions:**

**Raw\_data\_1:** Fig.2H Knockdown of p115 suppresses the cytotoxicity of LegA15.

**Raw\_data\_2:** Fig.3C LegA15 inhibits the secretion of SEAP.

**Raw\_data\_3:** Fig.4B Ligand binding analyses of LegA15 by synchronous fluorescence titration.

**Raw\_data\_4:** Fig.5A The GTPase activity of LegA15.

**Raw\_data\_5:** Fig.5B Enzyme kinetics of LegA15 measured using a concentration gradient of GTP with 1  $\mu$ M LegA15.

**Raw\_data\_6:** Fig.5C The divalent metal ions were required for the GTPase activity.

**Raw\_data\_7:** Fig.5D The GTPase activity of LegA15 was impaired by all GTP binding mutations.

**Raw\_data\_8:** Fig.5F Replacement of Lys367 with arginine preserved the GTPase activity of LegA15.

**Raw\_data\_9:** fig. S1A Viability of mammalian cells expressing FLAG-LegA15.

**Raw\_data\_10-13:** fig. S6 Fluorescence titrations for nucleotides binding to LegA15.

**Raw\_data\_14:** fig. S8A Viability of HEK293T cells expressing Flag-LegA15 or its mutants.

**Raw\_data\_15:** fig. S8B SEAP activity expressing Flag-LegA15 or its mutants.

**Raw\_data\_16:** fig. S9B Mutations of the triad residues affected LegA15 in SEAP activity.

**Raw\_data\_17:** fig. S9C Mutations of the triad residues affected LegA15 in GTP hydrolysis.

**Raw\_data\_18:** fig. S10B Impact of *legA15* on the growth of *L. pneumophila* in the U937 cells.

**Raw\_data\_19:** fig. S10C Impact of *p115* on the growth of *L. pneumophila* in the U937 cells
